# Metabolic Syndrome and Risk of Coronary, Cerebral, and Peripheral Vascular Disease in a Large Dutch Population With Familial Hypercholesterolemia

JAMAL S. RANA, MD, PHD<sup>1,2</sup>  
ANGELIQUE C. JANSEN, MD, PHD<sup>1</sup>  
AEILKO H. ZWINDERMAN, PHD<sup>3</sup>  
MAX NIEUWDORP, MD<sup>1</sup>

EMILY S. VAN AALST-COHEN, MD, PHD<sup>1</sup>  
J. WOUTER JUKEMA, MD, PHD<sup>4</sup>  
MIEKE D. TRIP, MD, PHD<sup>1</sup>  
JOHN J.P. KASTELEIN, MD, PHD<sup>1</sup>

**V**arious studies (1–16) in recent years have reported that the metabolic syndrome is associated with an increase in cardiovascular disease (CVD). However, there is still an uncertainty about the clinical importance and consequences of the metabolic syndrome (17). There is paucity of data looking at the effect of metabolic syndrome, specifically on cerebrovascular (CeVD) (9,12,18,19) and peripheral vascular (PVD) disease. Heterozygous familial hypercholesterolemia (FH) is a common hereditary disorder of lipoprotein metabolism (prevalence 1:400). The disorder is caused by mutations in the LDL receptor gene. The objective of our study was to assess if there was an additional risk associated with the presence of metabolic syndrome for coronary disease, CeVD, and PVD in this high-risk population, which included patients inducted from 27 clinics around the Netherlands.

## RESEARCH DESIGN AND METHODS

The database for the current study is the molecular diagnostic center for nationwide FH screening in the Netherlands, located at the Academic Medical Centre, University of Amsterdam. A total of 2,400 patients fulfilled the diagnostic criteria for FH and were in-

cluded in the study. The inclusion and exclusion criteria for participation in the study and details of the data collection are outlined and previously discussed in detail (20–22). The ethics institutional review board of each participating hospital approved the protocol.

Metabolic syndrome was defined as per National Cholesterol Education Program Adult Treatment Plan criteria (23), along with the recently suggested modifications (24). We did not have waist circumference information, so we substituted for BMI and based our cut offs on a recent National Health and Nutrition Examination Survey III analysis (25). A diagnosis required the concomitant presence of three or more of the following risk factors: 1) elevated triglycerides ( $\geq 1.7$  mmol/l), 2) low HDL cholesterol (men  $< 1.03$  mmol/l; women  $< 1.29$  mmol/l), 3) fasting glucose  $\geq 5.55$  mmol/l or medication use for diabetes, 4) systolic blood pressure  $\geq 130$  mmHg or diastolic blood pressure  $\geq 85$  mmHg or medication use for hypertension, and 5) BMI  $\geq 30$  kg/m<sup>2</sup> for men and  $\geq 25$  kg/m<sup>2</sup> for women. Total CVD was defined by the presence of at least one of the following: 1) coronary heart disease (CHD), 2) CeVD, or 3) PVD. The criteria to define

each one of these three end points have been explained previously in detail (21).

Differences in clinical characteristics between patients with and without metabolic syndrome were tested with  $\chi^2$  statistics or independent sample *t* tests where appropriate. We analyzed the lifetime risk of CVD in these patients. The relative risks (RRs) were estimated from a Cox regression analysis that modeled the lifetime hazard of events; thus, we looked at the risk of CVD events starting at birth and ending for each individual at the date of the first occurrence of established CVD. Patients without CVD were censored at the date of the last lipid clinic visit or at the date of death attributable to other causes. We verified any vascular end point that may have occurred before presentation to the vascular lipid clinics. The following variables were entered into the analyses: sex, smoking (time dependent), LDL cholesterol, and statin therapy. For smoking, we implemented a linearly decreasing risk effect for the 3 years after cessation (26). Analyses were performed using SPSS (Version 10.1; Chicago, IL) and SAS software (Version 8.02; Cary, NC). A *P* value  $< 0.05$  was considered to be statistically significant.

**RESULTS**—Of 2,400 patients with FH, we had all five variables to make a diagnosis of metabolic syndrome in 1,698 patients. Of these, metabolic syndrome was present in 31%. Prevalence of overt diabetes was low (5.4% among those with metabolic syndrome and 0.4% among without metabolic syndrome).

A higher number of patients with metabolic syndrome suffered from any CVD (39%) versus those without metabolic syndrome (24%; *P*  $< 0.001$ ). Table 1 shows that patients with metabolic syndrome were at an increased risk of CHD (RR 1.54 [95% CI 1.23–1.94]) and PVD (1.97 [1.13–3.45]). For CeVD, the results were not significant.

Additionally, we evaluated if increasing the number of risk factors for metabolic syndrome would have any incremental affect. Risk increased with in-

From the <sup>1</sup>Department of Vascular Medicine, Academic Medical Center, Amsterdam, the Netherlands; the <sup>2</sup>Department of Medicine, University of Pittsburgh, Pittsburgh, Pennsylvania; the <sup>3</sup>Department of Medical Statistics, Academic Medical Center, Amsterdam, the Netherlands; and the <sup>4</sup>Department of Cardiology, Leiden University Medical Center, Leiden, the Netherlands.

Address correspondence and reprint requests to John J.P. Kastelein, MD, PhD, Professor of Medicine, Chairman, Department of Vascular Medicine, Academic Medical Center, Meibergdreef 9, Room F4–159.2, 1105 AZ Amsterdam, Netherlands. E-mail: j.j.kastelein@amc.uva.nl.

Received for publication 23 December 2005 and accepted in revised form 2 February 2006.

**Abbreviations:** CeVD, cerebrovascular disease; CHD, coronary heart disease; CVD, cardiovascular disease; FH, familial hypercholesterolemia; PVD, peripheral vascular disease.

A table elsewhere in this issue shows conventional and Système International (SI) units and conversion factors for many substances.

DOI: 10.2337/dc05-2530

© 2006 by the American Diabetes Association.

The costs of publication of this article were defrayed in part by the payment of page charges. This article must therefore be hereby marked "advertisement" in accordance with 18 U.S.C. Section 1734 solely to indicate this fact.

Table 1—Characteristics and RRs by metabolic syndrome status in 1,698 patients with FH

|                                         | Metabolic syndrome  |                            | P value |
|-----------------------------------------|---------------------|----------------------------|---------|
|                                         | Absent              | Present                    |         |
| Patient characteristics                 |                     |                            |         |
| n                                       | 1,041 (69)          | 657 (31)                   |         |
| Age (years)                             | 42 ± 12             | 48 ± 12                    | <0.001  |
| Female sex                              | 508 (49)            | 351 (53)                   | 0.06    |
| BMI (kg/m <sup>2</sup> )                | 24.1 ± 3.0          | 27.1 ± 3.6                 | <0.001  |
| Triglycerides (mmol/l)                  | 1.45 ± 0.75         | 2.43 ± 1.16                | <0.001  |
| HDL cholesterol (mmol/l)                | 1.30 ± 0.35         | 1.04 ± 0.27                | <0.001  |
| Fasting glucose (mmol/l)                | 4.82 ± 0.65         | 5.45 ± 1.24                | <0.001  |
| Systolic blood pressure (mmHg)          | 130 ± 17            | 142 ± 19                   | <0.001  |
| Diastolic blood pressure (mmHg)         | 80 ± 10             | 86 ± 10                    | <0.001  |
| LDL cholesterol (mmol/l)                | 7.2 ± 1.9           | 7.4 ± 1.9                  | 0.064   |
| Diabetes                                | 4 (0.4)             | 35 (5.4)                   | <0.001  |
| Current smoking                         | 326 (32)            | 230 (36)                   | 0.08    |
| Family history of myocardial infarction | 561 (54)            | 362 (55)                   | 0.63    |
| Statin therapy                          | 304 (29)            | 252 (38)                   | <0.001  |
| RRs*                                    |                     |                            |         |
| CHD                                     | 209 (20); reference | 225 (34); 1.54 (1.23–1.94) | <0.001  |
| CeVD                                    | 26 (2.5); reference | 29 (4.4); 1.64 (0.88–3.05) | 0.12    |
| PVD                                     | 30 (2.9); reference | 41 (6.2); 1.97 (1.13–3.45) | 0.017   |
| Total CVD                               | 245 (24); reference | 256 (39); 1.50 (1.21–1.85) | <0.001  |

Data are means ± SD, n (%), or RR (95% CI). \*Adjusted for sex, smoking, LDL cholesterol, and statin therapy.

creasing risk factors for metabolic syndrome for CHD (one to two risk factors: RR 1.65 [95% CI 0.93–2.92] and three or more risk factors: 2.42 [1.37–4.29]) and total CVD (one to two risk factors: 1.60 [0.96–2.68] and three or more risk factors: 2.29 [1.36–3.83]). Patients with zero risk factors had no incidence of PVD, and therefore the reference point was the presence of less than three risk factors (three or more risk factors: 1.72 [0.99–3.02]). Again, there was no significant increased risk for CeVD with increasing number of risk factors (one to two risk factors: 0.83 [0.24–2.88] and three or more risk factors: 1.40 [0.41–4.84]).

**CONCLUSIONS**— Among a Dutch population of FH, we found that those with metabolic syndrome were 1.5 times more likely to develop total CVD after adjustment for established risk factors. Additionally, we separately explored and found that there was a higher risk of developing CHD and PVD among FH patients with metabolic syndrome.

Our results regarding increased risk of CVD are consistent with other studies (16). The finding that metabolic syndrome plays a role in determining risk in FH patients, even in those that are already on statin therapy, underscores the importance of vigorous screening and addi-

tional pharmacological modulation of these metabolic factors (27).

There are limitations to our study. Our results are derived from patients referred to lipid clinics, and therefore caution is required when interpreting the results. Patients at the highest risk might have died before visiting a lipid clinic, which might have caused underestimation of our results. However, in mortality analyses we rarely observed such early deaths (28).

The present study is the first of its kind that looks at metabolic syndrome as an entity in patients with FH and shows that it is a risk factor for total CVD, along with CHD and PVD. The impact and utility of different therapeutic options for metabolic syndrome in different dyslipidemias remains an important area of future research.

## References

1. Kastelein J: Metabolic and cardiovascular disease: complications and consequences. *Atheroscler Suppl* 6:1–2, 2005
2. Lakka HM, Laaksonen DE, Lakka TA, Niskanen LK, Kumpusalo E, Tuomilehto J, Salonen JT: The metabolic syndrome and total and cardiovascular disease mortality in middle-aged men. *JAMA* 288:2709–2716, 2002
3. Isomaa B, Almgren P, Tuomi T, Forsen B,

Lahti K, Nissen M, Taskinen MR, Groop L: Cardiovascular morbidity and mortality associated with the metabolic syndrome. *Diabetes Care* 24:683–689, 2001

4. Bonora E, Kiechl S, Willeit J, Oberhollenzer F, Egger G, Bonadonna RC, Muggeo M: Carotid atherosclerosis and coronary heart disease in the metabolic syndrome: prospective data from the Bruneck study. *Diabetes Care* 26:1251–1257, 2003
5. Resnick HE, Jones K, Ruotolo G, Jain AK, Henderson J, Lu W, Howard BV: Insulin resistance, the metabolic syndrome, and risk of incident cardiovascular disease in nondiabetic American Indians: the Strong Heart Study. *Diabetes Care* 26:861–867, 2003
6. Rutter MK, Meigs JB, Sullivan LM, D'Agostino RB Sr, Wilson PW: C-reactive protein, the metabolic syndrome, and prediction of cardiovascular events in the Framingham Offspring Study. *Circulation* 110:380–385, 2004
7. Malik S, Wong ND, Franklin SS, Kamath TV, L'Italien GJ, Pio JR, Williams GR: Impact of the metabolic syndrome on mortality from coronary heart disease, cardiovascular disease, and all causes in United States adults. *Circulation* 110:1245–1250, 2004
8. Hunt KJ, Resendez RG, Williams K, Haffner SM, Stern MP: National Cholesterol Education Program versus World Health Organization metabolic syndrome in relation to all-cause and cardiovascular mortality in the San Antonio Heart Study.

- Circulation* 110:1251–1257, 2004
9. Ford ES: The metabolic syndrome and mortality from cardiovascular disease and all-causes: findings from the National Health and Nutrition Examination Survey II Mortality Study. *Atherosclerosis* 173: 309–314, 2004
  10. Katzmarzyk PT, Church TS, Blair SN: Cardiorespiratory fitness attenuates the effects of the metabolic syndrome on all-cause and cardiovascular disease mortality in men. *Arch Intern Med* 164:1092–1097, 2004
  11. Onat A, Ceyhan K, Basar O, Erer B, Toprak S, Sansoy V: Metabolic syndrome: major impact on coronary risk in a population with low cholesterol levels: a prospective and cross-sectional evaluation. *Atherosclerosis* 165:285–292, 2002
  12. McNeill AM, Rosamond WD, Girman CJ, Golden SH, Schmidt MI, East HE, Ballantyne CM, Heiss G: The metabolic syndrome and 11-year risk of incident cardiovascular disease in the atherosclerosis risk in communities study. *Diabetes Care* 28:385–390, 2005
  13. Ridker PM, Buring JE, Cook NR, Rifai N: C-reactive protein, the metabolic syndrome, and risk of incident cardiovascular events: an 8-year follow-up of 14,719 initially healthy American women. *Circulation* 107:391–397, 2003
  14. Sattar N, Gaw A, Scherbakova O, Ford I, O'Reilly DS, Haffner SM, Isles C, Macfarlane PW, Packard CJ, Cobbe SM, Shepherd J: Metabolic syndrome with and without C-reactive protein as a predictor of coronary heart disease and diabetes in the West of Scotland Coronary Prevention Study. *Circulation* 108:414–419, 2003
  15. Girman CJ, Rhodes T, Mercuri M, Pyorala K, Kjekshus J, Pedersen TR, Beere PA, Gotto AM, Clearfield M, the 4S Group, the AFCAPS/TexCAPS Research Group: The metabolic syndrome and risk of major coronary events in the Scandinavian Simvastatin Survival Study (4S) and the Air Force/Texas Coronary Atherosclerosis Prevention Study (AFCAPS/TexCAPS). *Am J Cardiol* 93:136–141, 2004
  16. Ford ES: Risks for all-cause mortality, cardiovascular disease, and diabetes associated with the metabolic syndrome: a summary of the evidence. *Diabetes Care* 28:1769–1778, 2005
  17. Vinicor F, Bowman B: The metabolic syndrome: the emperor needs some consistent clothes (Letter). *Diabetes Care* 27:1243, 2004
  18. Milionis HJ, Rizos E, Goudevenos J, Seferiadis K, Mikhailidis DP, Elisaf MS: Components of the metabolic syndrome and risk for first-ever acute ischemic non-embolic stroke in elderly subjects. *Stroke* 36:1372–1376, 2005
  19. Ninomiya JK, L'Italien G, Criqui MH, Whyte JL, Gamst A, Chen RS: Association of the metabolic syndrome with history of myocardial infarction and stroke in the Third National Health and Nutrition Examination Survey. *Circulation* 109:42–46, 2004
  20. Jansen AC, van Aalst-Cohen ES, Tanck MW, Trip MD, Lansberg PJ, Liem AH, van Lennep HW, Sijbrands EJ, Kastelein JJ: The contribution of classical risk factors to cardiovascular disease in familial hypercholesterolaemia: data in 2400 patients. *J Intern Med* 256:482–490, 2004
  21. Jansen AC, Aalst van-Cohen ES, Hutten BA, Buller HR, Kastelein JJP, Prins MH: Guidelines were developed for data collection from medical records for use in retrospective analyses. *J Clin Epidemiol* 58: 269–274, 2005
  22. Fouchier SW, Defesche JC, Umans-Eckenhuis MW, Kastelein JP: The molecular basis of familial hypercholesterolemia in the Netherlands. *Hum Genet* 109:602–615, 2001
  23. Expert Panel on Detection, Evaluation, and Treatment of High Blood Cholesterol in Adults: Executive summary of the third report of the National Cholesterol Education Program (NCEP) Expert Panel on Detection, Evaluation, and Treatment of High Blood Cholesterol in Adults (Adult Treatment Panel III). *JAMA* 285:2486–2497, 2001
  24. Grundy SM, Cleeman JI, Daniels SR, Donato KA, Eckel RH, Franklin BA, Gordon DJ, Krauss RM, Savage PJ, Smith SC Jr, Spertus JA, Costa F, the American Heart Association, the National Heart, Lung, and Blood Institute: Diagnosis and management of the metabolic syndrome: an American Heart Association/National Heart, Lung, and Blood Institute Scientific Statement. *Circulation* 112:2735–2752, 2005
  25. Zhu S, Wang Z, Heshka S, Heo M, Faith MS, Heymsfield SB: Waist circumference and obesity-associated risk factors among whites in the third National Health and Nutrition Examination Survey: clinical action thresholds. *Am J Clin Nutr* 76:743–749, 2002
  26. Rea TD, Heckbert SR, Kaplan RC, Smith NL, Lemaitre RN, Psaty BM: Smoking status and risk for recurrent coronary events after myocardial infarction. *Ann Intern Med* 137: 494500, 2002
  27. Flordellis CS, Ilias I, Papavassiliou AG: New therapeutic options for the metabolic syndrome: what's next? *Trends Endocrinol Metab* 16:254–260, 2005
  28. Sijbrands EJ, Westendorp RG, Defesche JC, de Meier PH, Smelt AH, Kastelein JJ: Mortality over two centuries in large pedigree with familial hypercholesterolaemia: family tree mortality study. *BMJ* 322: 1019–1023, 2001
